# Supplementary material
Source: publisher figshare collection journal article supplement (https://f1000.figshare.com/ndownloader/files/1487572)
Supplement: Supplementary file 1 [file 1487572]

[Ala] (mM)	Rate/[DltA] D-Ala 1	Rate/[DltA] D-Ala 2	Rate/[DltA] D-Ala 3	Rate/[DltA] D-Ala 4	Rate/[DltA] L-Ala 1	Rate/[DltA] L-Ala 2	Rate/[DltA] L-Ala 3	Rate/[DltA] L-Ala 4
0	0							0
0.5	8.402041	9.407146	6.603848	6.325089
1	13.60031	10.13742	7.287004	9.634865	0.565371	0	2.779741	1.866902
2	14.18924	12.98783	12.73655	10.69493	3.651355	4.09894	3.706321	3.451119
4	14.42481	16.01885	13.18414	17.28504	5.323911	3.737731	4.884178	3.539458
8	18.5002	16.47428	13.49038	18.4629	9.069493	5.897134	6.383981	6.336867
16	21.28779	17.29093	14.3934	21.11307	10.7499	13.05065	7.224185	10.29446
32	21.91598	18.86141	16.83549	24.48763	15.12368	14.13428	13.83589	12.21437
64					20.35336	19.48174	17.90342	18.88693
